# Supplementary material for: Molecular Cloning, Expression and Transport Activity of SaNPF6.3/SaNRT1.1, a Novel Protein of the Low-Affinity Nitrate Transporter Family from the Euhalophyte Suaeda altissima (L.) Pall
Source: MDPI journal article supplement (doi:10.3390/membranes13100845), 2023-10-22
Supplement: s1 [file s1]

## Supplementary materials

|                  |     |                              |                   |                              |                                    |                                                    |                |                           |                  |                                      |                                     |     |
|------------------|-----|------------------------------|-------------------|------------------------------|------------------------------------|----------------------------------------------------|----------------|---------------------------|------------------|--------------------------------------|-------------------------------------|-----|
| <i>Sa</i> NRT1.1 | 1   | MAHNITSMDMEIGKD              | I                 | VCDAWDYKGRPA                 | A                                  | RSKTGGWQ                                           | SAAMILGGEACERL | TTLG                      | IAVNLVTYLT       | TGVMHLGNAASANTVTNFMGT                | 85                                  |     |
| <i>Sf</i> NRT1.1 | 1   | MAHNITSMDMEIGKD              | T                 | VCDAWDYKGRPAD                | R                                  | SKTGGWQ                                            | SAAMILGGEACERL | TTLG                      | IAVNLVTYLT       | TGVMHLGNAASANTVTNFMGT                | 85                                  |     |
| <i>Sg</i> NRT1.1 | 1   | MAHNITSMDMEIGKD              | T                 | VCDAWDYKGRPAD                | R                                  | SKTGGWK                                            | SAAMILGGEACERL | TTLG                      | IAVNLVTYLT       | TGVMHLGNAASANTVTNFMGT                | 85                                  |     |
| <i>Sa</i> NRT1.1 | 86  | SFMLCLLGGF                   | I                 | ADTFLGRYLT                   | I                                  | AIFATIQALG                                         | VTVLT          | I                         | STIIPSLRPPK      | CEEGSDSCIPASDTQLGVLYLALYLTALGTGGVKAS | 170                                 |     |
| <i>Sf</i> NRT1.1 | 86  | SFMLCLLGGF                   | I                 | ADTFLGRYLT                   | I                                  | AIFATIQALG                                         | VTVLT          | I                         | STIIPSLRPPK      | CEEGSDSCIPASDTQLGVLYLALYLTALGTGGVKAS | 170                                 |     |
| <i>Sg</i> NRT1.1 | 86  | SFMLCLLGGF                   | I                 | ADTFLGRYLT                   | I                                  | AIFATIQALG                                         | VTVLT          | I                         | STIIPSLRPPK      | CV                                   | EEGSDSCIPASDTQLGVLYLALYLTALGTGGVKAS | 170 |
| <i>Sa</i> NRT1.1 | 171 | VSGFGTDQFDES                 | N                 | KD                           | EKLHMIKFFNW                        | FFFF                                               | I              | SLGSLAAVT                 | ILVYIQDNMGRQWGYG | I                                    | CACAIMLALVIFLCGTRRYRFKKLVGSP        | 255 |
| <i>Sf</i> NRT1.1 | 171 | VSGFGTDQFDES                 | N                 | K                            | EKLHMIKFFNW                        | FFFF                                               | I              | SLGSLAAVT                 | ILVYIQDNMGRQWGYG | I                                    | CACAIMLALVIFLCGTRRYRFKKLVGSP        | 255 |
| <i>Sg</i> NRT1.1 | 171 | VSGFGTDQFDES                 | N                 | K                            | EKLHMIKFFNW                        | FFFF                                               | I              | SLGSLAAVT                 | ILVYIQDNMGRQWGYG | I                                    | CACAIMLALVIFLCGTRRYRFKKLVGSP        | 255 |
| <i>Sa</i> NRT1.1 | 256 | LTQIAAVFVAAWRKRHMELPSDSSLLFN | I                 | DDLADGGKHKKQKLPHSKQYRFLDRAAI | KDPQMPSVVT                         | KVNIWYLP                                           | T              | STDVEEVKL                 |                  |                                      | 340                                 |     |
| <i>Sf</i> NRT1.1 | 256 | LTQIAAVFVAAWRKRHMELPSDSSLLFN | I                 | DDLADGGKHKKQKLPHSKQYRFLDRAAI | KDPQMPSVVT                         | KVNIWYLP                                           | T              | STDVEEVKL                 |                  |                                      | 340                                 |     |
| <i>Sg</i> NRT1.1 | 256 | LTQIAAVFVAAWRKRHMELPSDSSLLFN | I                 | DDLADGGKHKKQKLPHSKQYRFLDRAAI | KDPQMPSVVT                         | KVNIWYLP                                           | T              | STDVEEVKL                 |                  |                                      | 340                                 |     |
| <i>Sa</i> NRT1.1 | 341 | VLRMLPIWATTII                | F                 | WTIYAQMSTFSVSQATTMDRH        | I                                  | GSSFR                                              | I              | PAASLTVFFVGSILITVPIYDRVVP | I                | AS                                   | KLLHNPPQGLTPLQR                     | 425 |
| <i>Sf</i> NRT1.1 | 341 | VLRMLPIWATTII                | F                 | WTIYAQMSTFSVSQATTMDRH        | I                                  | GSSFR                                              | I              | PAASLTVFFVGSILITVPIYDRVVP | I                | AS                                   | RLLHNPPQGLTPLQR                     | 425 |
| <i>Sg</i> NRT1.1 | 341 | VLRMLPIWATTII                | F                 | WTIYAQMSTFSVSQATTMDRS        | I                                  | GSSFQ                                              | I              | PAASLTVFFVGSILITVPIYDRVVP | I                | AS                                   | KILLHNPPQGLTPLQR                    | 425 |
| <i>Sa</i> NRT1.1 | 426 | IAVGLVFSII                   | SMVSAALVEIRRLKVAQ | D                            | AGLVNKP                            | FQVVPLSVFWLVPQFFFVGAGEAFTYIGQLDFFLRECPKGMKTMSTGLFL |                |                           |                  |                                      | 510                                 |     |
| <i>Sf</i> NRT1.1 | 426 | IAVGLVFSII                   | SMVSAALVEIRRLKVAQ | D                            | AGLVNKP                            | FQVVPLSVFWLVPQFFFVGAGEAFTYIGQLDFFLRECPKGMKTMSTGLFL |                |                           |                  |                                      | 510                                 |     |
| <i>Sg</i> NRT1.1 | 426 | IAVGLVFSII                   | SMVSAALVEIRRLKVAQ | E                            | AGLVNKP                            | FQVVPLSVFWLVPQFFFVGAGEAFTYIGQLDFFLRECPKGMKTMSTGLFL |                |                           |                  |                                      | 510                                 |     |
| <i>Sa</i> NRT1.1 | 511 | TTLSLGFFVSSVLVS              | AVHKITGDKHPW      | IADNLNRGR                    | LDYFYWLLAGLSVLNFLVYLLFAKWYVYKEKRLA | E                                                  | EGYIVEEEDDGPAC |                           |                  |                                      | 595                                 |     |
| <i>Sf</i> NRT1.1 | 511 | TTLSLGFFVSSVLVS              | AVHKITGDKHPW      | IADNLNRGR                    | LDYFYWLLAGLSVLNFLVYLLFAKWYVYKEKRLA | D                                                  | EGYIVEEEDDGPAC |                           |                  |                                      | 595                                 |     |
| <i>Sg</i> NRT1.1 | 511 | TTLSLGFFVSSVLVS              | AVHKITGDKHPW      | IADNLNRGR                    | LDYFYWLLAGLSVLNFLVYLLFAKWYVYKEKRLA | E                                                  | EGYIVEEEDDGPAC |                           |                  |                                      | 595                                 |     |
| <i>Sa</i> NRT1.1 | 596 | H                            |                   |                              |                                    |                                                    |                |                           |                  |                                      | 596                                 |     |
| <i>Sf</i> NRT1.1 | 596 | H                            |                   |                              |                                    |                                                    |                |                           |                  |                                      | 596                                 |     |
| <i>Sg</i> NRT1.1 | 596 | H                            |                   |                              |                                    |                                                    |                |                           |                  |                                      | 596                                 |     |

**Figure S1.** Alignment of the proteins from *Suaeda*, *Sa*NRT1.1, *Sf*NRT1.1 and *Sg*NRT1.1. The protein sequences of *Sf*NRT1.1 and *Sg*NRT1.1 were obtained by translation of the contigs in the *S. fruticosa* and *S. glauca* transcriptomes.

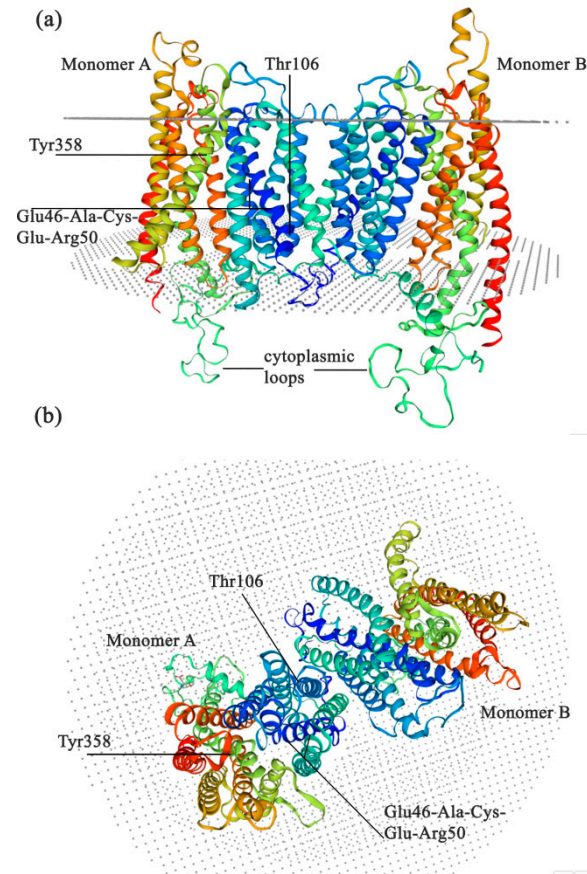

**Figure S2.** SaNPF6.3 model predicted by Swiss-Model software (<https://swissmodel.expasy.org/> (accessed on 20 September 2023)). The key motifs (ExxER, EACER), amino acid residues (Thr106, Tyr358) and cytoplasmic loops are marked; (a) side view and (b) top view.

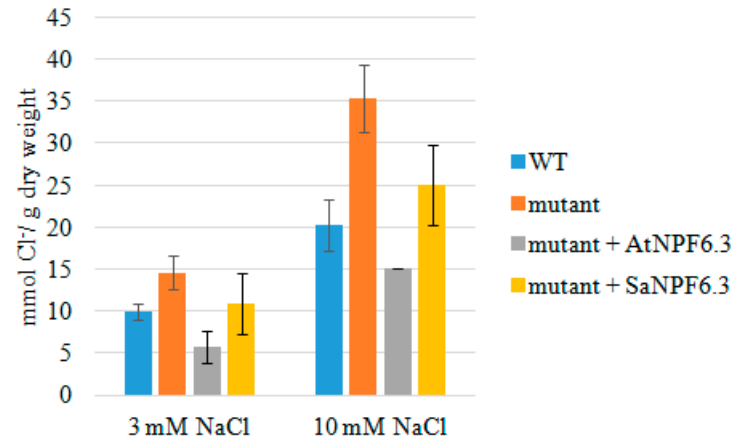

**Figure S3.** Chloride absorption from the liquid minimal SD media containing NaCl (3 or 10 mM) and NaNO<sub>3</sub> (1 mM) by the yeast strains; the initial wet weight of the yeast suspension was 10 mg/ml. Controls: wild type DL-1 strain and the mutant *Δynt1* strain, transformed with vectors pCHLX and pCCUR2, and the mutant *Δynt1* strain transformed with pCHLX-*AtNPF6.3* and pCCUR2. The yeast cells grew in the liquid media for 18 hours at 37°C; absorption of chloride by the cells was determined by measuring chloride concentration decline in incubation media using Cl<sup>-</sup>-selective electrode (Niko-Analit, Moscow, Russia).

**Table S1.** List of the primers used in the research.

| Primer name        | Nucleotide sequences (5'-3')                      | Primer designation                                                                                                                         |
|--------------------|---------------------------------------------------|--------------------------------------------------------------------------------------------------------------------------------------------|
| SaNPF6.3_f         | GACAGACCAATTCGACGAGA                              | Amplification of the cDNA central part of the SaNPF6.3 gene;<br>Amplification of 5'- and 3'- fragments of SaNPF6.3 cDNA (1st round of PCR) |
| SaNPF6.3_r         | CTAATAAGTAGTGTACGGTTGTCA                          |                                                                                                                                            |
| SaNPF6.3_F1        | CCTAGTCGAAATCAGGCG                                | Amplification of 5'- and 3'- fragments of SaNPF6.3 cDNA (2nd round of PCR);                                                                |
| SaNPF6.3_5'RACE_R1 | GATGTTGGCAAGTACCAGATGTTG                          |                                                                                                                                            |
| SaNPF6.3_R1        | CTCCCACGAAGAAGAATTGAG                             | RT-qPCR with SaNPF6.3_F1 primer                                                                                                            |
| ZeoYNTRfl_F        | GGCTTTAATTTGCAATCGGCCGAACACGTGGTCAAGATCTGTTTTTCCC | Amplification of the right flanking sequence of the YNT1 locus to                                                                          |
| pBlueYNTRfl_R      | GGCTTTAATTTGCAATCGGCCGAACACGTGGTCAAGATCTGTTTTTCCC |                                                                                                                                            |

|                |                                                     |                                                                                                         |
|----------------|-----------------------------------------------------|---------------------------------------------------------------------------------------------------------|
|                |                                                     | obtain a deletion mutant $\Delta ynt1$                                                                  |
| pBlueYNTLfl_F  | CTGCAGGAATTCGATCGGAGGTTCATGGATCAGGC                 | Amplification of the left flanking sequence of the YNT1 locus to obtain a deletion mutant $\Delta ynt1$ |
| YNTLflZeo_R    | TGGTGTGTGGGGCGGCCGAACAAGAAGAGGCGGAAAAGCAAACC        |                                                                                                         |
| ZeoCas1        | GTTCGGCCGCCCCACACACCATAGCTTCAAA                     | Zeocin resistance gene amplification                                                                    |
| ZeoCas2        | GTTCGGCCGATTGCAAATTAAAGCCTTCGAG                     |                                                                                                         |
| SaNPF6.3_Gib_F | ATGGCTCATAATATTACTAGTATGGATATGGAAATTGG              | SaNPF6.3 full-length coding sequence amplification from cDNA                                            |
| SaNPF6.3_Gib_R | TTAGTGACATGCTGGCCCGT                                |                                                                                                         |
| AtNPF6.3_Gib_F | ATGTCTCTTCCTGAACTAAATCTGATG                         | AtNPF6.3 full-length coding sequence amplification from cDNA                                            |
| AtNPF6.3_Gib_R | TCAATGACCCATTGGAATACTCGGC                           |                                                                                                         |
| pYNR1_F        | GGTCGACGGTATCGATAAGCTTATGGGGCTCCATATATCGTATGAC      | amplification of the YNR1 nitrate reductase promoter                                                    |
| pYNR1_R        | CCATACTAGTAATATTATGAGCCATTACAACCTATCCAAAGTTCGTGAGGA |                                                                                                         |
| tYNR1_F        | CGGGCCAGCATGTCACTAACCTAAGCGAAATCGAAATCAAACT         | amplification of the nitrate reductase terminator                                                       |
| tYNR1_R        | CCCGGGCTGCAGGAATTAATTCAGTATTTCAGAATCATGACCCC        |                                                                                                         |

|                      |                                                                |                                                                                 |
|----------------------|----------------------------------------------------------------|---------------------------------------------------------------------------------|
|                      |                                                                | YNR1                                                                            |
| SaNPF6.3_1074_F      | GCACAAATGAGTACTTTCTCCGTG                                       | Introduction of Tyr358His amino acid substitution                               |
| SaNPF6.3_Tyr358His_R | ATGGATTGTCCAGAAAATAATAGTGGTG                                   |                                                                                 |
| SaNPF6.3_318_F       | ATTGCTATCTTTGCAACAATCCAAGC                                     | Introduction of the amino acid substitution Thr106Asp or Thr106Ala              |
| SaNPF6.3_Thr106Asp_R | ATCTAGATACCTTCCAAGGAAGGTGTCAG                                  |                                                                                 |
| SaNPF6.3_Thr106Ala_R | AGCTAGATACCTTCCAAGGAAGGTGTC                                    |                                                                                 |
| pYNR1_GFP_F          | CACGAACTTTGGATAGTTGTAATGAGCAAGGGCGAGGAACTG                     | mGFP amplification                                                              |
| TEV_GFP_R            | TGAAAATATAAATTTTCCCCGGGCTTGTACAGCTCGTCCATGC                    |                                                                                 |
| TEV_SaNPF6.3_F       | CCCGGGGAAAATTTATATTTTCAAGGTCAATTTATGGCTCATAATATTACTAGTATGGATAT | SaNPF6.3 full-length coding sequence amplification from pCHLX-GFP-SaNPF6.3 cDNA |
| SaNPF6.3_Gib_R       | TTAGTGACATGCTGGCCCGT                                           |                                                                                 |
| pYNR1_R3             | TACAACTATCCAAAGTTCGTGAGGA                                      | Amplification of a linear form of pCHLX-pYNR1-tYNR1                             |
| DL-1_Chr2_HpURA3_F   | GAGGTGAAGTCGTTGACGCA                                           | PCR screening                                                                   |
| Hp_DL-1_Chr1_R       | TTGGTACCACCGCACTTCTC                                           | PCR screening                                                                   |
| AtNPF6.3_388R        | ATCTTGGTGGTCGAAGTCCC                                           | sequencing                                                                      |
| AtNPF6.3_934F        | ATCAGGAAGCGGGAGTTACC                                           |                                                                                 |
| AtNPF6.3_1106R       | GTCTCGGATTGTGCGACTGA                                           |                                                                                 |
| pYNR1_R2             | CATCAGATTTAGTTTCAGGAAGAGACATTACAACCTATCCAAAGTTCGTGAGGA         | Amplification of                                                                |

|                |                                                    |                                                        |
|----------------|----------------------------------------------------|--------------------------------------------------------|
| tYNR1_F2       | GCCGAGTATTCCAATGGGTCATTGACCTAAGCGAAATCGAAATCAAAACT | the nitrate<br>reductase<br>promoter and<br>terminator |
| SaNPF6.3_1632R | GCGGTTCAAGTTGTCAGCAA                               | sequencing                                             |
| SaNPF6.3_391R  | GCAGGCTCGGGATTATGGTAG                              |                                                        |
| SaeEF1alfa_F1  | TGAGATGTGTGGCAATCC                                 | RT-qPCR                                                |
| SaeEF1alfa_R1  | GTTGCTTCTGACTCCAAGAAT                              |                                                        |
| SaPP2A_RT_F1   | GAGCTTTTTCGTATCGGCGG                               |                                                        |
| SaPP2A_RT_R1   | CCAGCAGCGTAACAGTCTCT                               |                                                        |

**Table S2.** List of the *A. thaliana* NPF genes and the corresponding proteins.

| Gene             | Araport ID (TAIR) | UniProtKB ID |
|------------------|-------------------|--------------|
| <i>AtNPF1.1</i>  | AT3G16180         | Q8LPL2       |
| <i>AtNPF1.2</i>  | AT1G52190         | Q9M817       |
| <i>AtNPF1.3</i>  | AT5G11570         | Q9LYD5       |
| <i>AtNPF2.1</i>  | AT3G45720         | Q9M171       |
| <i>AtNPF2.2</i>  | AT3G45690         | Q9M174       |
| <i>AtNPF2.3</i>  | AT3G45680         | Q9M175       |
| <i>AtNPF2.4</i>  | AT3G45700         | Q9M173       |
| <i>AtNPF2.5</i>  | AT3G45710         | Q9M172       |
| <i>AtNPF2.6</i>  | AT3G45660         | Q9M1E1       |
| <i>AtNPF2.7</i>  | AT3G45650         | Q9M1E2       |
| <i>AtNPF2.8</i>  | AT5G28470         | Q3E8X3       |
| <i>AtNPF2.9</i>  | AT1G18880         | Q9MV7        |
| <i>AtNPF2.10</i> | AT3G47960         | Q944G5       |
| <i>AtNPF2.11</i> | AT5G62680         | Q9LV10       |
| <i>AtNPF2.12</i> | AT1G27080         | Q9LFX9       |
| <i>AtNPF2.13</i> | AT1G69870         | Q8RX77       |
| <i>AtNPF2.14</i> | AT1G69860         | Q9CAR9       |
| <i>AtNPF3.1</i>  | AT1G68570         | Q9SX20       |
| <i>AtNPF4.1</i>  | AT3G25260         | Q9LSF0       |
| <i>AtNPF4.2</i>  | AT3G25280         | Q9LSE8       |
| <i>AtNPF4.3</i>  | AT1G59740         | Q93VV5       |
| <i>AtNPF4.4</i>  | AT1G33440         | Q56XQ6       |
| <i>AtNPF4.5</i>  | AT1G27040         | Q8VYE4       |
| <i>AtNPF4.6</i>  | AT1G69850         | Q8H157       |
| <i>AtNPF4.7</i>  | AT5G62730         | Q9FM20       |
| <i>AtNPF5.1</i>  | AT2G40460         | Q8VZR7       |
| <i>AtNPF5.2</i>  | AT5G46050         | Q9FNL7       |
| <i>AtNPF5.3</i>  | AT5G46040         | Q9FNL8       |
| <i>AtNPF5.4</i>  | AT3G54450         | Q9M1I2       |
| <i>AtNPF5.6</i>  | AT2G37900         | P0CI03       |
| <i>AtNPF5.7</i>  | AT3G53960         | Q9M331       |
| <i>AtNPF5.8</i>  | AT5G14940         | Q9LFR1       |
| <i>AtNPF5.9</i>  | AT3G01350         | Q9SRI2       |
| <i>AtNPF5.10</i> | AT1G22540         | Q0WP01       |
| <i>AtNPF5.11</i> | AT1G72130         | Q8RX67       |
| <i>AtNPF5.12</i> | AT1G72140         | Q9C7U1       |
| <i>AtNPF5.13</i> | AT1G72125         | Q0WSZ6       |
| <i>AtNPF5.14</i> | AT1G72120         | Q8VZE2       |
| <i>AtNPF5.15</i> | AT1G22570         | Q9SK99       |
| <i>AtNPF5.16</i> | AT1G22550         | Q9SK96       |
| <i>AtNPF6.1</i>  | AT5G13400         | Q9LYR6       |
| <i>AtNPF6.2</i>  | AT2G26690         | Q9SZY4       |
| <i>AtNPF6.3</i>  | AT1G12110         | Q05085       |
| <i>AtNPF6.4</i>  | AT3G21670         | Q9LVE0       |
| <i>AtNPF7.1</i>  | AT5G19640         | Q3E9B5       |
| <i>AtNPF7.2</i>  | AT4G21680         | Q8GXN2       |
| <i>AtNPF7.3</i>  | AT1G32450         | Q9LQL2       |
| <i>AtNPF8.1</i>  | AT3G54140         | Q9M390       |
| <i>AtNPF8.2</i>  | AT5G01180         | Q9LFB8       |
| <i>AtNPF8.3</i>  | AT2G02040         | P46032       |
| <i>AtNPF8.4</i>  | AT2G02020         | Q84WG0       |
| <i>AtNPF8.5</i>  | AT1G62200         | Q93Z20       |



**Table S3.** List of several gene sequences homologous to sequence *AtNPF6.3*, key motifs and amino acid residues of the corresponding proteins.

| Species                        | Protein name       | Glu-x-x-Glu-Arg motif (ExxER)     | Thr(T) | Lys (K) | His(H)/ Tyr(Y) | Glu (E) | Pro (P) | Gene ID (GenBank) |
|--------------------------------|--------------------|-----------------------------------|--------|---------|----------------|---------|---------|-------------------|
| <i>Arabidopsis thaliana</i>    | AtNPF6.3           | 41–45 Glu-Ala-Val-Glu-Arg (EAVER) | 101    | 164     | His 356        | 476     | 492     | NP_563899.1       |
| <i>Suaeda altissima</i>        | SaNPF6.3           | 46–50 Glu-Ala-Cys-Glu-Arg (EACER) | 106    | 168     | Tyr 358        | 482     | 498     | OQ330855          |
| <i>Thellungiella halophila</i> | ThNPF6.3           | 38–42 Glu-Val-Val-Glu-Arg (EVVER) | 98     | 159     | Tyr 346        | 463     | 479     | BAJ33792.1        |
| <i>Salicornia bigelovii</i>    | SbNPF6.3           | 54–58 Glu-Ala-Cys-Glu-Arg (EACER) | 114    | 176     | Tyr 366        | 490     | 506     | Sbi_g26995.t1*    |
| <i>Medicago truncatula</i>     | MtNPF6.3           | 41–45 Glu-Ala-Cys-Glu-Arg (EACER) | 101    | 164     | Tyr 356        | 480     | 496     | XP_003608752.1    |
|                                | MtNPF6.8 (NRT1.3)  | 44–48 Glu-Leu-Ala-Glu-Arg (ELAER) | 104    | 169     | Tyr 350        | 465     | 481     | GU966590.1        |
| <i>Zea mays</i>                | ZmNPF6.4 (NRT1.1A) | 46–50 Glu-Leu-Asn-Glu-Arg (ELNER) | 106    | 172     | Tyr 370        | 493     | 509     | BT053880.1        |
|                                | ZmNPF6.6 (NRT1.1B) | 44–48 Glu-Leu-Phe-Glu-Arg (ELFER) | 104    | 169     | His 362        | 479     | 495     | XM_008660202.3    |
|                                | ZmNRT1.1C          | 44–48 Glu-Leu-Phe-Glu-Arg (ELFER) | 104    | 166     | His 356        | 472     | 488     | XM_008660209.3    |
|                                | ZmNRT1.1D          | 49–53 Glu-Leu-Asn-Glu-Arg (ELNER) | 109    | 176     | Tyr 368        | 484     | 500     | XM_008651564.2    |
| <i>Oryza sativa</i>            | OsNPF6.3(NRT1.1A)  | 47–51 Glu-Leu-Asn-Glu-Arg (ELNER) | 107    | 169     | Tyr 366        | 488     | 504     | XP_015650127.1    |
|                                | OsNPF6.5(NRT1.1B)  | 44–48 Glu-Leu-Phe-Glu-Arg (ELFER) | 104    | 169     | His 362        | 479     | 495     | XP_015614015.1    |
|                                | OsNPF6.4(NRT1.1C)  | 58–62 Glu-Leu-Asn-Glu-Arg         | 118    | 180     | Tyr 369        | 482     | 498     | XP_015632236.1    |

|                                                               |           |                                      |     |     |         |     |     |                |
|---------------------------------------------------------------|-----------|--------------------------------------|-----|-----|---------|-----|-----|----------------|
|                                                               |           | (ELNER)                              |     |     |         |     |     |                |
| <i>Sorghum<br/>bicolor</i>                                    | SbNRT1.1A | 46–50 Glu-Leu-Asn-Glu-Arg<br>(ELNER) | 106 | 170 | Tyr 364 | 486 | 502 | XM_002443834.2 |
|                                                               | SbNRT1.1B | 44–48 Glu-Leu-Phe-Glu-Arg<br>(ELFER) | 104 | 169 | His 359 | 478 | 494 | XM_002464914.2 |
|                                                               | SbNRT1.1C | 53–57 Glu-Leu-Asn-Glu-Arg<br>(ELNER) | 113 | 177 | Tyr 374 | 490 | 506 | XM_002468647.2 |
| <i>Populus<br/>trichocarpa</i><br>(black<br>cottonwood)       | PtNPF6.3  | 40–44 Glu-Ala-Met-Glu-Arg<br>(EAMER) | 100 | 161 | Tyr 347 | 471 | 487 | XM_002303476.4 |
| <i>Brachypodium<br/>distachyon</i><br>(purple false<br>brome) | BdNRT1.1A | 44–48 Glu-Leu-Asn-Glu-Arg<br>(ELNER) | 104 | 168 | Tyr 363 | 484 | 500 | XP_003573480.1 |
|                                                               | BdNRT1.1B | 48–52 Glu-Leu-Phe-Glu-Arg<br>(ELFER) | 108 | 173 | His 365 | 481 | 497 | XP_003574312.1 |
|                                                               | BdNRT1.1C | 52–56 Glu-Leu-Phe-Glu-Arg<br>(ELFER) | 112 | 177 | His 367 | 483 | 499 | XP_003572060.1 |
|                                                               | BdNRT1.1D | 64–68 Glu-Leu-Asn-Glu-Arg<br>(ELNER) | 124 | 189 | Tyr 381 | 494 | 510 | XP_003562233.3 |
| <i>Brassica<br/>napus</i><br>(rapeseed)                       | BnNPF6.3  | 40–44 Glu-Ala-Val-Glu-Arg<br>(EAVER) | 100 | 163 | His 355 | 475 | 491 | XP_013698339.2 |
| <i>Brassica rapa</i><br>(Chinese<br>cabbage)                  | BrNPF6.3  | 40–44 Glu-Ala-Val-Glu-Arg<br>(EAVER) | 100 | 163 | His 355 | 475 | 491 | XP_009110669.1 |
| <i>Capsicum<br/>annuum</i><br>(pepper)                        | CaNPF6.3  | 42–46 Glu-Ala-Val-Glu-Arg<br>(EAVER) | 102 | 164 | Tyr 354 | 478 | 494 | KAF3635032.1   |
| <i>Citrus</i>                                                 | CcNPF6.3  | 41–45 Glu-Ala-Cys-Glu-Arg            | 101 | 164 | Tyr 356 | 479 | 495 | XP_006440344.1 |

|                                             |          |                                      |     |     |         |     |     |                |
|---------------------------------------------|----------|--------------------------------------|-----|-----|---------|-----|-----|----------------|
| <i>clementina</i>                           |          | (EACER)                              |     |     |         |     |     |                |
| <i>Glycine max</i><br>(soybean)             | GmNPF6.3 | 41–45 Glu-Val-Met-Glu-Arg<br>(EVMER) | 101 | 164 | His 347 | 471 | 487 | XM_003517379.5 |
| <i>Lactuca sativa</i><br>(lettuce)          | LsNPF6.3 | 41–45 Glu-Ala-Cys-Glu-Arg<br>(EACER) | 101 | 164 | Tyr 359 | 483 | 499 | XP_023738876.1 |
| <i>Nicotiana<br/>tabacum</i><br>(tobacco)   | NtNPF6.3 | 42–46 Glu-Ala-Val-Glu-Arg<br>(EAVER) | 102 | 165 | Tyr 359 | 482 | 498 | XP_016452049.1 |
| <i>Prunus<br/>persica</i><br>(peach)        | PpNPF6.3 | 44–48 Glu-Ala-Cys-Glu-Arg<br>(EACER) | 104 | 167 | Tyr 359 | 483 | 499 | BAC81420.1     |
| <i>Solanum<br/>lycopersicum</i><br>(tomato) | SINPF6.3 | 42–46 Glu-Ala-Val-Glu-Arg<br>(EAVER) | 102 | 164 | Tyr 354 | 478 | 494 | XP_004244572.1 |
| <i>Solanum<br/>tuberosum</i><br>(potato)    | StNPF6.3 | 42–46 Glu-Ala-Val-Glu-Arg<br>(EAVER) | 101 | 164 | Tyr 354 | 478 | 494 | XP_006358355.1 |
| <i>Vitis vinifera</i><br>(grape)            | VvNPF6.3 | 93–97 Glu-Ala-Cys-Glu-Arg<br>(EACER) | 153 | 216 | Tyr 408 | 532 | 548 | WJZ82426.1     |

Note: \*amino acid sequence of SbNPF6.3 found in the *Salicornia* database (<https://www.salicorniadb.org/Home.html> (accessed on 20 September 2023)).
